# Supplementary material
Source: MDPI journal article supplement (https://www.mdpi.com/1424-8247/15/7/770)
Supplement: s1 [file s1]

**Supplementary Table S1:** Available PDB structures of mechanosensitive channels.

| Protein name                                                                                                             | PDB number | Organism               | Structural family | Remarks                                           | Reference |
|--------------------------------------------------------------------------------------------------------------------------|------------|------------------------|-------------------|---------------------------------------------------|-----------|
| Mechanosensitive channel of small conductance (MscS)                                                                     | 2OAU       | <i>E. coli</i>         | MscS              | Version 1.2                                       | [33]      |
| Mechanosensitive channel of large conductance (MscL)                                                                     | 2OAR       | <i>M. tuberculosis</i> | MscL              | Version 1.3                                       |           |
| C-terminal domain truncation of the <i>Mycobacterium tuberculosis</i> mechanosensitive channel of large conductance MscL | 6CTD       | <i>M. tuberculosis</i> | MscL              | Version 1.1                                       | [107]     |
| Open structure of MscS                                                                                                   | 2VV5       | <i>E. coli</i>         | MscS              | Version 1.1                                       | [108]     |
| Cryo-EM structure of mechanosensitive channel MscS in PC-10 nanodiscs                                                    | 6VYL       | <i>E. coli</i>         | MscS              | Version 1.2<br>Related structure 6VYK, 6VYL, 6VYM | [46]      |
| Cryo-EM structure of mechanosensitive channel MscS in PC-18:1 nanodiscs treated with beta-cyclodextran                   | 6VYM       | <i>E. coli</i>         | MscS              | Version 1.2                                       |           |
| Cryo-EM structure of mechanosensitive channel MscS in PC-18:1 nanodiscs                                                  | 6VYK       | <i>E. coli</i>         | MscS              | Version 1.2                                       |           |
| MscS Nanodisc                                                                                                            | 6PWP       | <i>E. coli</i>         | MscS              | Version 1.0<br>Related structure 6PWN, 6PWO, 6PWP | [34]      |
| MscS Nanodisc with N-terminal His-tag                                                                                    | 6PWN       | <i>E. coli</i>         | MscS              | Version 1.0                                       |           |
| MscS DDM                                                                                                                 | 6PWO       | <i>E. coli</i>         | MscS              | Version 1.0                                       |           |
| Structure of the mechanosensitive channel MscS embedded in the membrane bilayer                                          | 6RLD       | <i>E. coli</i>         | MscS              | Version 1.2                                       | [109]     |
| MTSSL spin labeled D67C mutant of MscS in the open form                                                                  | 4AGE       | <i>E. coli</i>         | MscS              | Version 1.2                                       | [110]     |

|                                                                                             |      |                                      |      |                                                                                              |       |
|---------------------------------------------------------------------------------------------|------|--------------------------------------|------|----------------------------------------------------------------------------------------------|-------|
|                                                                                             |      |                                      |      | Related Structures:<br>4AGE, 4AGF                                                            |       |
| MTSSL spin labeled L124C mutant of MscS in the open form                                    | 4GF  | <i>E. coli</i>                       | MscS | Version 1.2                                                                                  |       |
| Structure of a tetrameric MscL in an expanded intermediate state                            | 3HZQ | <i>S. aureus</i>                     | MscL | Version 1.3<br>see also: <i>S. aureus</i> MscL is pentameric <i>in vivo</i> <sup>[111]</sup> | [112] |
| MscS D67R1 high resolution                                                                  | 5AJI | <i>E. coli</i>                       | MscS | Version 1.2                                                                                  | [113] |
| Cryo-EM structure of mechanosensitive channel MscS reconstituted into peptidiscs            | 6UZH | <i>E. coli</i>                       | MscS | Version 1.1                                                                                  | [114] |
| Mechanosensitive channel MscS solubilized with DDM in closed conformation                   | 7ONL | <i>E. coli</i>                       | MscS | Version 1.0<br>Related structure:<br>7ONJ, 7ONL, 7OO0, 7OO6, 7OO8, 7OOA                      | [115] |
| Mechanosensitive channel MscS solubilized with DDM in closed conformation with added lipid  | 7OO6 | <i>E. coli</i>                       | MscS | Version 1.0                                                                                  |       |
| Mechanosensitive channel MscS solubilized with DDM in open conformation                     | 7OO0 | <i>E. coli</i>                       | MscS | Version 1.0                                                                                  |       |
| Mechanosensitive channel MscS solubilized with LMNG in open conformation                    | 7ONJ | <i>E. coli</i>                       | MscS | Version 1.0                                                                                  |       |
| Mechanosensitive channel MscS solubilized with LMNG in open conformation with added lipid   | 7OOA | <i>E. coli</i>                       | MscS | Version 1.0                                                                                  |       |
| Mechanosensitive channel MscS solubilized with LMNG in closed conformation with added lipid | 7OO8 | <i>E. coli</i>                       | MscS | Version 1.0                                                                                  |       |
| Cryo-EM structure of MscS channel YnaI                                                      | 5Y4O | <i>E. coli</i>                       | MscS | Version 1.0                                                                                  | [116] |
| Crystal structure of a membrane protein                                                     | 3UDC | <i>Caldanaerobacter subterraneus</i> | MscS | Version 1.2<br>Related structure:<br>3T9N, 3UDC                                              | [117] |

|                                                                                                        |      |                                      |      |                                                        |       |
|--------------------------------------------------------------------------------------------------------|------|--------------------------------------|------|--------------------------------------------------------|-------|
| Crystal structure of a membrane protein                                                                | 3T9N | <i>Caldanaerobacter subterraneus</i> | MscS | Version 1.1                                            |       |
| Crystal structure of <i>Helicobacter pylori</i> MscS (closed state)                                    | 4HW9 | <i>H. pylori</i>                     | MscS | Version 1.2<br>Related Structures:<br>4HW9, 4HWA       | [118] |
| Crystal Structure of <i>E. coli</i> MscS wild type (open state)                                        | 4HWA | <i>E. coli</i>                       | MscS | Version 1.1                                            |       |
| small conductance mechanosensitive channel YbiO                                                        | 7A46 | <i>E. coli</i>                       | MscS | Version 1.1<br>Related Structures:<br>6ZYD, 6ZYE, 7A46 | [119] |
| YnaI                                                                                                   | 6ZYD | <i>E. coli</i>                       | MscS | Version 1.0                                            |       |
| YnaI in an open-like conformation                                                                      | 6ZYE | <i>E. coli</i>                       | MscS | Version 1.0                                            |       |
| Low conductance mechanosensitive channel YnaI                                                          | 7N4T | <i>E. coli</i>                       | MscS | Version 1.0                                            | [120] |
| Extended sensor paddles with bound lipids revealed in mechanosensitive channel YnaI                    | 6URT | <i>E. coli</i>                       | MscS | Version 1.0                                            | [121] |
| Structure of the C-terminal domain of the <i>E. coli</i> mechanosensitive channel of large conductance | 4LKU | <i>E. coli</i>                       | MscL | Version 1.2                                            | [122] |
| Mechanosensitive channel MscS K180R mutant                                                             | 7DLU | <i>P. aeruginosa</i>                 | MscS | Version 1.0                                            | [123] |
